# Supplementary material
Source: HighWire-hosted journal article supplement (https://rc.rcjournal.com/highwire/filestream/23518/field_highwire_adjunct_files/1/rc-10081-File005.docx)
Supplement: rc-10081-File005.docx [file rc-10081-File005.docx]

**Supplemental Table B**: Logistic Regression

| **Multivariable Logistic Regression** | n | OR | 95% CI | P |
| --- | --- | --- | --- | --- |
| Parameter | 952 |  |  |  |
| **In the past month, what percentage of shifts have you been unable to complete all your work:**  0% - reference  100%  < 25%  < 50%  50-74%  75-99%  Do not provide patient care  Not reported | 249  43  301  118  92  116  28  5 | 0.84  1.10  1.38  0.77  0.90  5.82  0.21 | 0.38-1.88  0.71-1.71  0.78-2.44  0.42-1.41  0.51-1.60  0.86-39.4  0.004-9.91 | 0.68  0.68  0.26  0.40  0.72  0.071  0.43 |
| **In the past month, how many shifts have you worked without adequate RT staffing:**  Never - reference  Always (  Frequently (  Not reported  Occasionally  Rarely | 74  125  285  8  274  186 | 0.28  0.27  0.14  0.60  0.68 | 0.12-0.69  0.12-0.63  0.01-2.22  0.26-1.39  0.29-1.60 | 0.006  0.002  0.16  0.23  0.37 |
| **In the past month, what percentage of your shifts have you provided direct patient care to COVID-19 patients:**  Do not provide direct patient care  100%  < 50%  50-74%  75-99%  5Not reported | 47  261  249  145  247  3 | 10.5  6.2  5.8  9.3  n/a | 2.97-36.9  1.81-21.3  1.66-20.5  2.63-32.9  0-inf | <0.001  0.004  0.006  0.001  >0.99 |
| **What is your highest degree?**  Reference Associate  Bachelor’  Masters  Not reported  Other  PhD or doctorate | 423  435  84  1  4  5 | 0.87  0.56  0  2.59  n/a | 0.62-1.20  0.30-1.07  0-inf  0.13-51.5  0-inf | 0.39  0.079  >0.99  0.53  >0.99 |
| **What patient populations do you primarily care for?**  Adults – reference  Both  Do not provide patient care  Neonatal/pediatrics  Not reported | 508  164  25  248  7 | 1.30  Inf  1.01  0.36 | 0.84-2.01  0-inf  0.63-1.61  0.06-2.02 | 0.23  >0.99  0.97  0.25 |
| **What shift do you work?**  Day shift – reference  Evening  Night shift  Not reported  Rotating | 509  20  322  7  94 | 1.03  0.71  0.96  0.72 | 0.35-3.04  0.50-1.0  0.12-7.41  0.43-1.23 | 0.96  0.048  0.97  0.23 |
| **What is your role within your department?**  Leadership  Not reported  Other  Staff therapist | 240  8  16  688 | 0.45  0.30  0.33 | 0.08-2.55  0.08-1.08  0.22-0.51 | 0.37  0.066  <0.001 |
| **In the past month, I have missed work for any reason**  No – Reference  N/A or prefer not to answer  Yes | 619  41  292 | 2.25  0.69 | 0.88-5.77  0.49-0.99 | 0.091  0.044 |
| **In the past month, my activities have been restricted due to illness**  No – Reference  N/A or prefer not to answer  Yes | 749  48  155 | 0.86  1.06 | 0.38-1.91  0.69-1.63 | 0.70  0.81 |
| **People in this work environment (respiratory care department) are burned out from their work:**  No – reference  N/A or prefer not to answer  Yes | 170  11  771 | 1.93  0.42 | 0.26-14.2  0.23-0.75 | 0.52  0.003 |
| **Burned Out**  No – Reference  Yes | 198  754 | 1.37 | 0.70-2.69 | 0.63 |
| **Continuous Variables**  Burnout Score  Hours worked per week  Hours worked per week in ICU  Commute time |  | 0.98  1.01  1.0  1.00 | 0.97-0.99  0.99-1.03  0.99-1.01  1.00-1.01 | 0.001  0.42  0.46  0.63 |

*Supplemental Table B details the logistic regression analysis of survey responses.*
